# Supplementary material for: IL-33 is negatively associated with the BMI and confers a protective lipid/metabolic profile in non-diabetic but not diabetic subjects
Source: Springer Nature journal article supplement (doi:10.1186/1471-2172-15-19), 2014-05-10

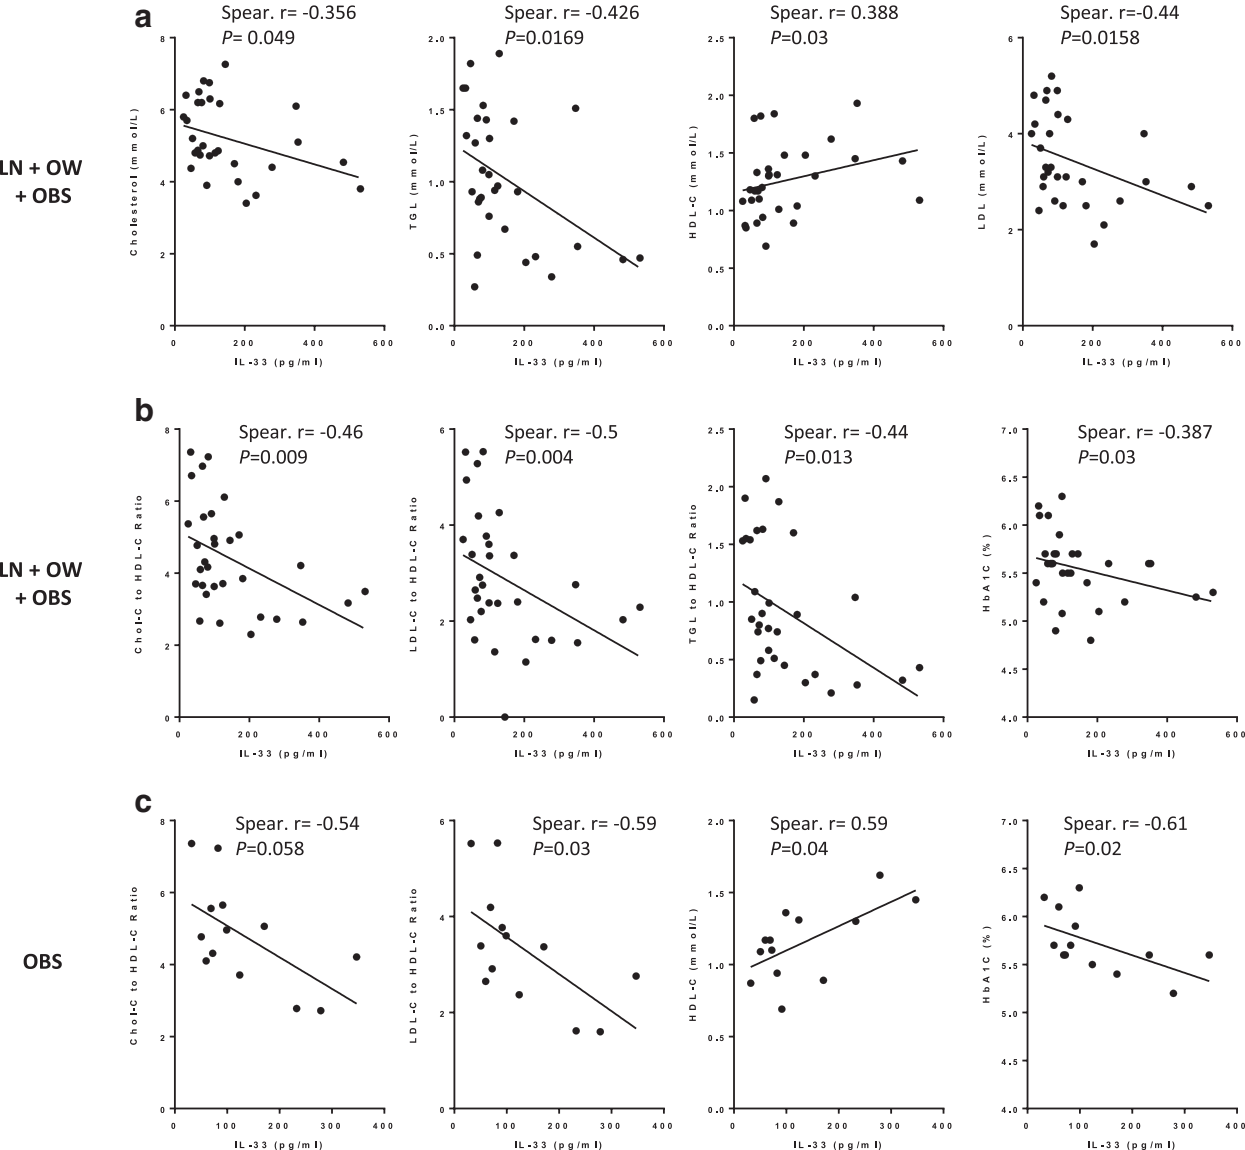

Supplement: 12865_2013_577_MOESM3_ESM.pdf [file 12865_2013_577_MOESM3_ESM.pdf]
